# Supplementary material for: Facile synthesis of novel Ni-BDC-NH2/Au NPs SERS substrates with synergistic enhancement effects for high-performance detection
Source: Royal Society of Chemistry journal article supplement (doi:10.1039/d4ay02086c), 2025-01-01
Supplement: d4ay02086c1.pdf [file d4ay02086c1.pdf]

**Supporting Information for**  
**“Facile synthesis of novel Ni-BDC-NH<sub>2</sub>/Au NPs SERS**  
**substrates with synergistic enhancement effects for**  
**high-performance detection”**

*Xinxing Jiang, Jihong Fu\*, Shuxian Ren, WenXia Xue,*

*Key Laboratory of Oil and Gas Fine Chemicals Ministry of Education & Xinjiang  
Uyghur Autonomous Region, School of Chemical Engineering and Technology,  
Xinjiang University, Urumqi 830017, Xinjiang, China.*

## **S1. Additional experimental details**

### **S1.1. Synthesis of Au NPs**

The dynamic seed growth method was employed to synthesize Au NPs of different sizes with minor modifications<sup>1</sup>. Briefly, 60 mL of trisodium citrate solution (2.2 mmol/L) was heated to boiling and refluxed for 15 min. Then, 0.4 mL of HAuCl<sub>4</sub> solution (25 mmol/L) was added and the reaction was heated for 30 min. The solution changed from yellow to blue-gray, and end up with a pink gold solution. Thus, Au seed solution was prepared. After that, the seed solution was cooled down to 90°C, and 0.4 mL of HAuCl<sub>4</sub> solution (25 mmol/L) was added to the solution, stirring for 30 min, and then repeated to finish the first round of reaction. Then, 22 mL of sample solution was removed with a straw and marked as “G1”. After that, the remaining sample solution was diluted with 21.2 mL of ultrapure water and 0.8 mL of sodium citrate (60 mmol/L). This resulting diluted solution served as a subsequent seed solution and the underwent the same growth process until achieving the desired generations of nanoparticles (G2-G5).

### **S1.2. Electrochemical measurement**

The Mott-Schottky measurement was performed using an electrochemical workstation (Chenhua, Shanghai) in a standard three-electrode cell. In detail, 2.0 mg of Ni-MOF powder was dispersed in 1.0 mL of ultra-pure water followed by ultrasonication for 30 min to form a homogeneous suspension. Subsequently, 20  $\mu$ L of suspension was dropped onto precleaned glassy carbon electrode (1 $\times$ 1 cm<sup>2</sup>) surface. Finally, the

working electrodes were prepared as the glassy carbon electrode being dried. To acquire the Mott-Schottky curves, the glassy carbon electrode was immersed in a solution of 0.5 mol/L Na<sub>2</sub>SO<sub>4</sub>. The counter electrode used was a platinum wire, and the reference electrode was an Ag/AgCl electrode. The Mott-Schottky curves were taken at three different frequencies. The potential ranged from -0.6 to 0.8 V (vs. Ag/AgCl).

## S2. Characterization of materials

### S2.1 SEM images and particles size statistics of Au NPs

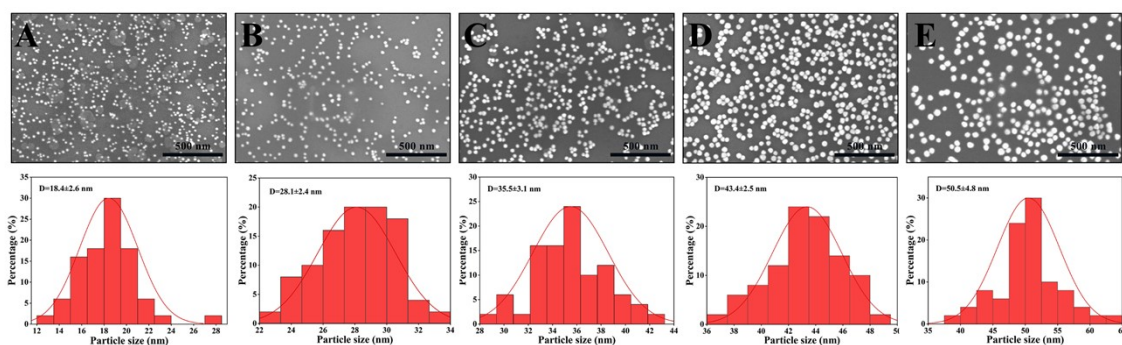

**Figure S1.** A-E SEM images of gold nanoparticles with different particle sizes (G1-G5) and the corresponding size distribution histograms of gold nanoparticles (n=50).

### S2.2 UV-Vis of different sizes of Au NPs

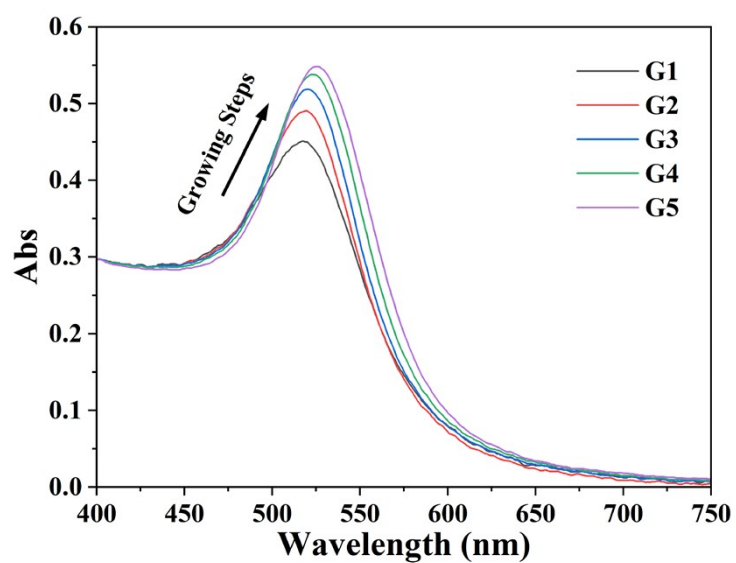

**Figure S2.** UV-visible absorption spectra of gold nanoparticles (G1-G5).

S2.3 N<sub>2</sub> adsorption and desorption curve and pore size distribution of Ni-BDC-NH<sub>2</sub>

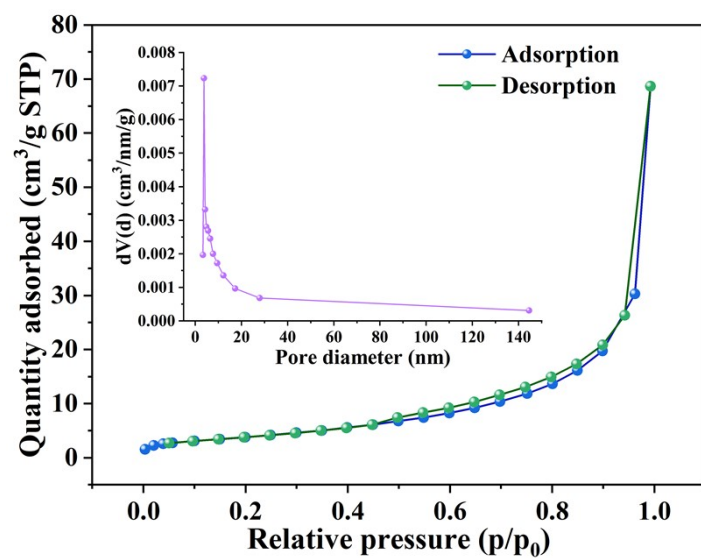

**Figure S3.** N<sub>2</sub> adsorption and desorption curve and pore size distribution map of Ni-BDC-NH<sub>2</sub>.

S2.4 SEM image, EDS mapping images and TEM image of Ni-BDC-NH<sub>2</sub>/Au NPs.

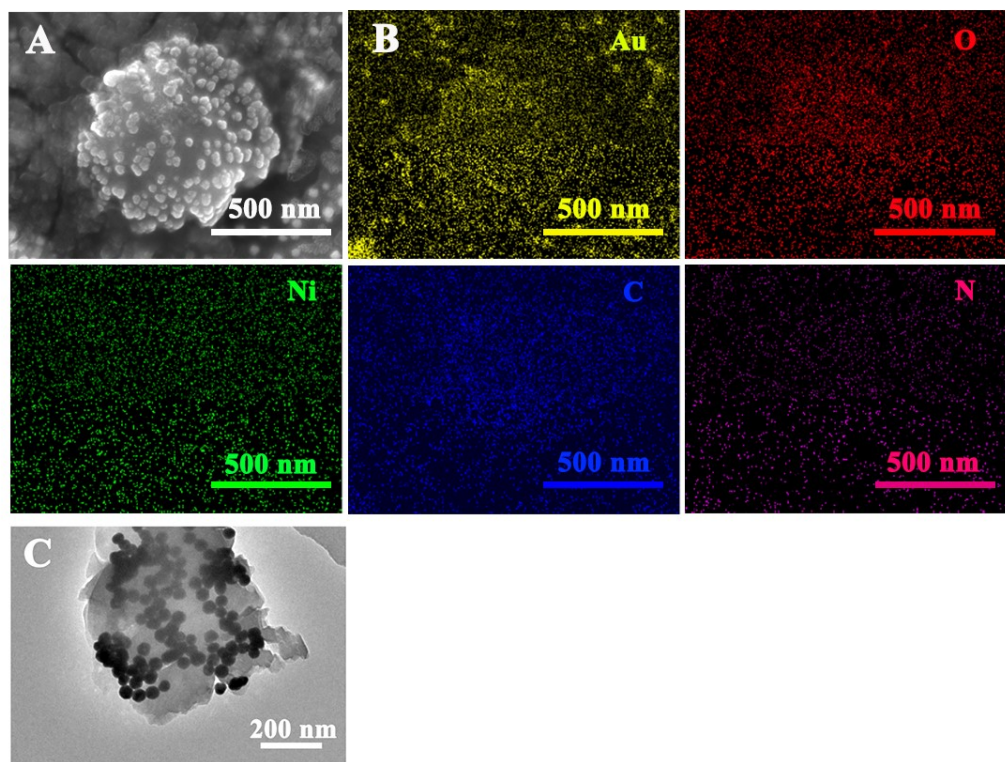

**Figure S4.** SEM image (A), EDS mapping images (B) and TEM image (C) of Ni-BDC-NH<sub>2</sub>/Au NPs.

### S3. Optimization of preparing conditions of Ni-BDC-NH<sub>2</sub>/Au NPs substrate

#### S3.1 Effect of size of Ni-BDC-NH<sub>2</sub>

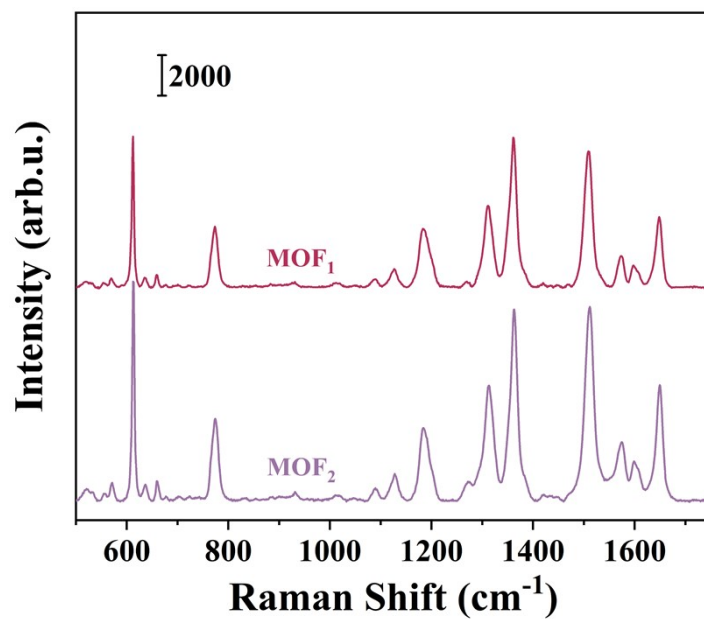

**Figure S5.** SERS spectra of 10<sup>-5</sup> mol/L R6G on Ni-BDC-NH<sub>2</sub>/Au NPs SERS substrates prepared by different sizes of Ni-BDC-NH<sub>2</sub> (MOF<sub>1</sub> and MOF<sub>2</sub>).

#### S4. The calculation for the EF of Ni-BDC-NH<sub>2</sub>/Au NPs SERS substrate

Enhancement factor (EF) is a significant index used for evaluating the Raman sensitivity of a SERS substrate. Here, the SERS EF value of Ni-BDC-NH<sub>2</sub>/AuNPs substrate was calculated by utilizing the formulas based on the previous method reported<sup>2</sup>. The specific equation is listed as follows:

$$EF = \frac{I_{SERS} \times C_{NR}}{I_{NR} \times C_{SERS}} = \frac{4914.71 \times 0.1}{445.99 \times 10^{-7}} = 1.10 \times 10^7$$

Where  $I_{SERS}$  represents the SERS intensity of R6G on the Ni-MOF/Au NPs substrate,  $I_{NR}$  represents the Raman intensity of R6G. And  $C_{SERS}$  ( $1.0 \times 10^{-7}$  mol/L) and  $C_{NR}$  (0.1 mol/L) are the corresponding concentrations of R6G used for SERS and control Raman tests, respectively. In the detection process, 20  $\mu$ L of the mixed solution dripped on a glass slide. Finally, the EF value of Ni-BDC-NH<sub>2</sub>/Au NPs substrate calculated is about  $1.10 \times 10^7$ . These results confirmed that prepared Ni-BDC-NH<sub>2</sub>/Au NPs SERS substrate has acceptable SERS activity.



**Table S1.** Summary of recently reported SERS substrates used for the analysis of MB and thiram

| SERS substrate                                                      | Target compounds | Linear range (mol/L)                   | R <sup>2</sup> | LODs (mol/L)       | Reference |
|---------------------------------------------------------------------|------------------|----------------------------------------|----------------|--------------------|-----------|
| CFP@PDA@Au NPs                                                      | MB               | 1×10 <sup>-7</sup> -1×10 <sup>-3</sup> | 0.9704         | 1×10 <sup>-7</sup> | 3         |
| Ag ND-50                                                            | MB               | 1×10 <sup>-7</sup> -1×10 <sup>-4</sup> | 0.998          | 1×10 <sup>-7</sup> | 4         |
| Fe <sub>3</sub> O <sub>4</sub> @SiO <sub>2</sub> @Ag nanocomposites | thiram           | 1×10 <sup>-7</sup> -1×10 <sup>-3</sup> | /              | 1×10 <sup>-6</sup> | 5         |
| Ag dendritic nanostructures                                         | thiram           | 1×10 <sup>-7</sup> -1×10 <sup>-4</sup> | /              | 1×10 <sup>-7</sup> | 6         |
| Ni-BDC-NH <sub>2</sub> /Au NPs                                      | MB               | 5×10 <sup>-7</sup> -5×10 <sup>-5</sup> | 0.9950         | 5×10 <sup>-8</sup> | This work |
|                                                                     | thiram           | 1×10 <sup>-6</sup> -5×10 <sup>-4</sup> | 0.9763         | 5×10 <sup>-7</sup> |           |

### S5. Anti-interference and selectivity test of Ni-BDC-NH<sub>2</sub>/Au NPs SERS substrate

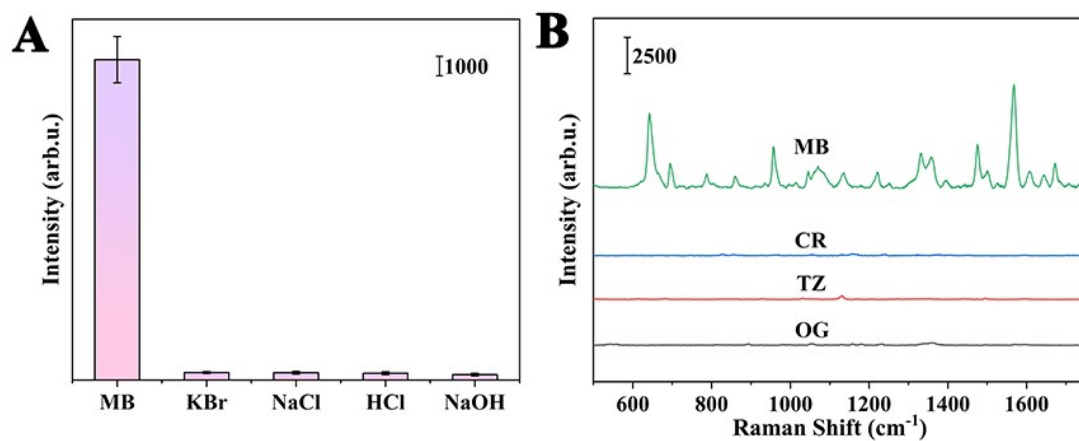

**Figure S6.** Anti-interference (A) and selectivity (B) of Ni-BDC-NH<sub>2</sub>/Au NPs SERS substrates.

## REFERENCES

1. N. G. Bastús, J. Comenge and V. Puntes, *Langmuir*, 2011, **27**, 11098-11105.
2. H. Li, Q. Wang, N. Gao, J. Fu, X. Yue, X. Lv, F. Zhong, J. Tang and T. Wang, *Applied Surface Science*, 2021, **545**, 148992.
3. J. Dong, T. Wang, E. Xu, F. Bai, J. Liu and Z. Zhang, *Journal*, 2022, **12**, 2163.
4. X. H. Vu, N. D. Dien, T. T. Ha Pham, T. T. Trang, N. X. Ca, P. T. Tho, N. D. Vinh and P. Van Do, *RSC Advances*, 2020, **10**, 38974-38988.
5. L. Li, A. Zhao, D. Wang, H. Guo, H. Sun and Q. He, *Journal of Nanoparticle Research*, 2016, **18**, 178.
6. Q. Wang, D. Wu and Z. Chen, *RSC Advances*, 2015, **5**, 70553-70557.
